# Supplementary material for: Associations between bolus infusion of hydrocortisone, glycemic variability and insulin infusion rate variability in critically Ill patients under moderate glycemic control
Source: PubMed Central journal article supplement (PMC4630319; doi:10.1186/s13613-015-0077-5), 2015-11-02
Supplement: 13613_2015_77_MOESM1_ESM.pdf [file 13613_2015_77_MOESM1_ESM.pdf]

**Additional file to ‘Associations between Bolus Infusion of Hydrocortisone, Glycemic Variability and Insulin Infusion Rate Variability in Critically Ill Patients under Moderate Glycemic Control’**

Roosmarijn T.M. van Hooijdonk MD, PhD<sup>1</sup>, Jan M. Binnekade PhD<sup>1</sup>, Lieuwe D.J. Bos PhD<sup>1,2</sup>, Janneke Horn MD, PhD<sup>1</sup>, Nicole P. Juffermans MD, PhD<sup>1,2</sup>, Ameen Abu-Hanna PhD<sup>3</sup>, Marcus J. Schultz PhD<sup>1,2</sup>

**Academic Medical Center, University of Amsterdam, Amsterdam, the Netherlands:**

<sup>1</sup>Department of Intensive Care Medicine, <sup>2</sup>Laboratory of Experimental Intensive Care and Anesthesiology (L·E·I·C·A), <sup>3</sup>Department of Medical Informatics

## Flow chart for blood glucose control

|                                                                                                                                                                                             |                                                                 |                                   |
|---------------------------------------------------------------------------------------------------------------------------------------------------------------------------------------------|-----------------------------------------------------------------|-----------------------------------|
| glucose > 360 mg/dL                                                                                                                                                                         | → Bolus of 6 units of insulin and start or increase with 4 IU/h | → Check after 1 hour              |
| glucose 216-360 mg/dL                                                                                                                                                                       | → Start or increase with 4 IU/h                                 | → Check after 1 hour              |
| glucose 144-216 mg/dL                                                                                                                                                                       | → Start or increase with 2 IU/h                                 | → Check after 1 hour              |
| glucose 90-144 mg/dL                                                                                                                                                                        | → When decrease of <50% *do not change infusion rate            | →                                 |
|                                                                                                                                                                                             | → When decrease $\geq$ 50%*, decrease infusion rate into halve  | → Check after 4 hours             |
| * from the most recent 2 measurements                                                                                                                                                       |                                                                 |                                   |
| Change or stop in nutrition                                                                                                                                                                 | → Change or stop insulin infusion always                        | → Check after 1 hour <sup>1</sup> |
| glucose 63-90 mg/dL                                                                                                                                                                         | → Decrease $\geq$ 50 % stop insulin infusion                    | → Check after 1 hour <sup>1</sup> |
|                                                                                                                                                                                             | → Decrease < 50 %: decrease infusion rate into halve            | → Check after 1 hour <sup>1</sup> |
| <sup>1</sup> when blood glucose level is normoglycemic or hyperglycemic after 1 hour restart insulin infusion with smaller steps (investigate the cause of drop in the blood glucose level) |                                                                 |                                   |
| glucose < 63 mg/dL                                                                                                                                                                          | → Stop insulin give 50 ml dextrose 20%                          | → Check after 20 minutes          |

**Table S1. Results of univariate and multivariate analysis with glycemic lability index**

| Variable                         | Univariate                        |         | Multivariate                      |         |
|----------------------------------|-----------------------------------|---------|-----------------------------------|---------|
|                                  | Percentage of change in           | P-value | Percentage of change in           | P-value |
|                                  | glycemic variability<br>[95 % CI] |         | glycemic variability<br>[95 % CI] |         |
| <b>APACHE II score &lt; 15</b>   |                                   |         |                                   |         |
| Bolus infusion of hydrocortisone | 25 [-13 – 79]                     | 0.219   | 37 [-3 – 94] <sup>a</sup>         | 0.076   |
| <b>APACHE II score 15–24</b>     |                                   |         |                                   |         |
| Bolus infusion of hydrocortisone | 28 [11 – 48]                      | < 0.001 | 36 [18 –57] <sup>b</sup>          | < 0.001 |
| <b>APACHE II score &gt; 24</b>   |                                   |         |                                   |         |
| Bolus infusion of hydrocortisone | 19 [3 – 38]                       | 0.022   | 13 [-6 – 36] <sup>c</sup>         | 0.208   |

Abbreviations: APACHE, Acute Physiology and Chronic Health Evaluation; BMI, body-mass index; CI; confidence interval

<sup>a</sup>multivariate model includes the significant confounders Admission Type, and BMI

<sup>b</sup>multivariate model includes the significant confounders Admission Type, gender and BMI

<sup>c</sup>multivariate model includes the significant confounders Admission Type, and gender

**Table S2. Results of multivariate analysis with insulin infusion rate variability**

| Variable                         | Multivariate including<br>glycemic variability (GLI) |
|----------------------------------|------------------------------------------------------|
| <b>APACHE II score &lt; 15</b>   |                                                      |
| Bolus infusion of hydrocortisone | 4.3 [2.7 – 6.9] <sup>a</sup>                         |
| <b>APACHE II score 15–24</b>     |                                                      |
| Bolus infusion of hydrocortisone | 4.0 [3.3 – 4.9]                                      |
| <b>APACHE II score &gt; 24</b>   |                                                      |
| Bolus infusion of hydrocortisone | 3.1 [2.6 – 3.7]                                      |

Abbreviations: APACHE, Acute Physiology and Chronic Health Evaluation; BMI, body-mass index; CI, confidence interval; GLI, glycemic lability index

<sup>a</sup>multivariate model includes the significant confounder BMI

**Table S3. Results of multivariate analysis with glycemic variability including diabetic status as confounder**

| Variable                         | Multivariate model glycemic variability (SD) |         | Multivariate model glycemic variability (GLI) |         |
|----------------------------------|----------------------------------------------|---------|-----------------------------------------------|---------|
|                                  | Percentage of change in glycemic variability | P-value | Percentage of change in glycemic variability  | P-value |
|                                  | [95 % CI]                                    |         | [95 % CI]                                     |         |
| <b>APACHE II score &lt; 15</b>   |                                              |         |                                               |         |
| Bolus infusion of hydrocortisone | 26 [8 – 47] <sup>a</sup>                     | 0.0034  | 43 [-6 – 116] <sup>a</sup>                    | 0.091   |
| <b>APACHE II score 15–24</b>     |                                              |         |                                               |         |
| Bolus infusion of hydrocortisone | 25 [18 – 34] <sup>b</sup>                    | < 0.001 | 42 [20 – 69] <sup>b</sup>                     | < 0.001 |
| <b>APACHE II score &gt; 24</b>   |                                              |         |                                               |         |
| Bolus infusion of hydrocortisone | 11 [4 – 19] <sup>c</sup>                     | < 0.003 | 12 [-6 – 35] <sup>c</sup>                     | 0.212   |

Abbreviations: APACHE, Acute Physiology and Chronic Health Evaluation; BMI, body-mass index; CI, confidence interval; GLI, glycemic lability index; SD, standard deviation

<sup>a</sup>multivariate model includes the significant confounders Admission Type, BMI and diabetic status

<sup>b</sup>multivariate model includes the significant confounders Admission Type, gender, BMI and diabetic status

<sup>c</sup>multivariate model includes the significant confounders Admission Type, gender and diabetic status

**Table S4. Results multivariate analysis with insulin infusion rate variability including diabetic status**

|                                  | <b>Multivariate including diabetes</b> | <b>Multivariate including glycemic variability (SD) and diabetes</b> | <b>Multivariate including glycemic variability (GLI) and diabetes</b> |
|----------------------------------|----------------------------------------|----------------------------------------------------------------------|-----------------------------------------------------------------------|
| <b>Variable</b>                  | <b>Odds Ratio<br/>[95%–CI]</b>         | <b>Odds Ratio<br/>[95%–CI]</b>                                       | <b>Odds Ratio<br/>[95%–CI]</b>                                        |
| <b>APACHE II score &lt; 15</b>   |                                        |                                                                      |                                                                       |
| Bolus infusion of hydrocortisone | 3.6 [2.0 – 6.5]                        | 3.7 [1.9 – 6.8] <sup>a</sup>                                         | 4.2 [2.3 – 7.6] <sup>a</sup>                                          |
| <b>APACHE II score 15–24</b>     |                                        |                                                                      |                                                                       |
| Bolus infusion of hydrocortisone | 3.8 [3.0 – 4.9]                        | 3.3 [2.6 – 4.3]                                                      | 3.8 [3.0 – 4.9]                                                       |
| <b>APACHE II score &gt; 24</b>   |                                        |                                                                      |                                                                       |
| Bolus infusion of hydrocortisone | 2.9 [2.3 – 3.7]                        | 2.9 [2.2 – 3.6]                                                      | 2.9 [2.3 – 3.7]                                                       |

Abbreviations: APACHE, Acute Physiology and Chronic Health Evaluation; BMI, body-mass index; CI, confidence interval; GLI, glycemic lability index; SD, standard deviation

<sup>a</sup>multivariate model includes the significant confounder BMI
